# Supplementary material for: The Effect of Fabry Disease Therapy on Bone Mineral Density
Source: MDPI journal article supplement (doi:10.3390/diseases12050102), 2024-05-13
Supplement: s1 [file s1]

## Supplementary Materials

**Supplementary Table S1:** Fabry specific therapy use in the treated group

|                                                             |                 |
|-------------------------------------------------------------|-----------------|
| Age at commencement of treatment – yrs                      | 39.1 ± 13.4     |
|                                                             |                 |
| Fabry specific therapy at baseline                          |                 |
| Agalsidase alfa                                             | 20 (52.6)       |
| Agalsidase beta                                             | 17 (44.7)       |
| Migalastat                                                  | 1 (2.6)         |
|                                                             |                 |
| Time between commencement of therapy<br>and first DXA – yrs | 1.4 [0.4 – 2.4] |

Mean ± standard deviation, median [interquartile range] or number (%)

**Supplementary Table S2:** Longitudinal change in bone density within group

|                             | Within group from linear mixed effects model |                         |              |
|-----------------------------|----------------------------------------------|-------------------------|--------------|
|                             | $\beta$ -coefficient                         | 95% confidence interval | P-value      |
| <b>Total hip Z-score</b>    |                                              |                         |              |
| Untreated                   | 0.092                                        | 0.059, 0.126            | <b>0.000</b> |
| Treated                     | -0.011                                       | -0.042, 0.120           | 0.490        |
|                             |                                              |                         |              |
| <b>Femoral neck Z-score</b> |                                              |                         |              |
| Untreated                   | 0.071                                        | 0.032, 0.110            | <b>0.000</b> |
| Treated                     | -0.009                                       | -0.038, 0.021           | 0.564        |

**Supplementary Table S3: Extended participant baseline characteristics**

| Pt Number | Treatment group | Sex    | Age at baseline (years) | Fabry specific therapy | Mutation (or nucleotide change) | eGFR at baseline (mL/min/1.73m2) | Increased left ventricular mass at baseline |
|-----------|-----------------|--------|-------------------------|------------------------|---------------------------------|----------------------------------|---------------------------------------------|
| 1         | Untreated       | Female | 21                      | Nil                    | delGlu358                       | 133                              | No                                          |
| 2         | Untreated       | Female | 51                      | Nil                    | delGlu358                       | 87                               | No                                          |
| 3         | Untreated       | Female | 46                      | Nil                    | R227Q                           | 88                               | No                                          |
| 4         | Untreated       | Female | 61                      | Nil                    | c.858_863delinsTTGGG            | 88                               | Yes                                         |
| 5         | Untreated       | Female | 20                      | Nil                    | N215S                           | 94                               | No                                          |
| 6         | Untreated       | Female | 23                      | Nil                    | N215S                           | 97                               | No                                          |
| 7         | Untreated       | Female | 42                      | Nil                    | N215S                           | 99                               | No                                          |
| 8         | Untreated       | Female | 21                      | Nil                    | c.858_863delinsTTGGG            | 100                              | No                                          |
| 9         | Untreated       | Female | 21                      | Nil                    | M284T                           | 132                              | No                                          |
| 10        | Untreated       | Female | 25                      | Nil                    | D165Y                           | 98                               | No                                          |
| 11        | Untreated       | Female | 24                      | Nil                    | c1193_1196del                   | 101                              | No                                          |
| 12        | Untreated       | Male   | 41                      | Nil                    | N215S                           | 156                              | No                                          |
| 13        | Untreated       | Female | 38                      | Nil                    | R227Q                           | 106                              | No                                          |
| 14        | Untreated       | Female | 35                      | Nil                    | R227Q                           | 122                              | No                                          |
| 15        | Untreated       | Female | 34                      | Nil                    | R227Q                           | 117                              | No                                          |
| 16        | Untreated       | Female | 71                      | Nil                    | Double                          | 86                               | No                                          |
| 17        | Untreated       | Female | 36                      | Nil                    | Double                          | 100                              | No                                          |
| 18        | Untreated       | Female | 24                      | Nil                    | R118C                           | 109                              | No                                          |
| 19        | Untreated       | Male   | 59                      | Nil                    | R118C                           | 111                              | No                                          |
| 20        | Untreated       | Female | 37                      | Nil                    | R227Q                           | 75                               | No                                          |
| 21        | Untreated       | Male   | 61                      | Nil                    | A143T                           | 64                               | No                                          |
| 22        | Untreated       | Female | 22                      | Nil                    | M284T                           | 108                              | No                                          |
| 23        | Untreated       | Female | 48                      | Nil                    | delA395                         | 93                               | No                                          |
| 24        | Untreated       | Female | 50                      | Nil                    | c.858_863delinsTTGGG            | 80                               | No                                          |
| 25        | Untreated       | Male   | 22                      | Nil                    | E6,c.833dupA                    | 147                              | No                                          |
| 26        | Untreated       | Male   | 52                      | Nil                    | N215S                           | 49                               | No                                          |
| 27        | Untreated       | Female | 46                      | Nil                    | delGlu358                       | 106                              | No                                          |
| 28        | Untreated       | Female | 49                      | Nil                    | E6,c.833dupA                    | 127                              | No                                          |
| 29        | Untreated       | Female | 31                      | Nil                    | R227Q                           | 111                              | No                                          |
| 30        | Untreated       | Female | 78                      | Nil                    | c.858_863delinsTTGGG            | 91                               | Yes                                         |
| 31        | Untreated       | Female | 59                      | Nil                    | M284T                           | 94                               | No                                          |
| 32        | Untreated       | Female | 38                      | Nil                    | N215S                           | 95                               | No                                          |
| 33        | Untreated       | Female | 60                      | Nil                    | N215S                           | 87                               | No                                          |
| 34        | Untreated       | Female | 31                      | Nil                    | pA156T                          | 101                              | No                                          |
| 35        | Untreated       | Female | 30                      | Nil                    | pA156T                          | 103                              | No                                          |
| 36        | Untreated       | Female | 45                      | Nil                    | pA156T                          | 109                              | No                                          |
| 37        | Untreated       | Female | 70                      | Nil                    | N215S                           | 75                               | No                                          |
| 38        | Untreated       | Male   | 38                      | Nil                    | N215S                           | 88                               | No                                          |
| 39        | Untreated       | Female | 44                      | Nil                    | M284T                           | 98                               | No                                          |
| 40        | Untreated       | Female | 18                      | Nil                    | M284T                           | 99                               | No                                          |
| 41        | Untreated       | Female | 28                      | Nil                    | M1L                             | 91                               | No                                          |
| 42        | Untreated       | Female | 28                      | Nil                    | M1L                             | 92                               | No                                          |
| 43        | Untreated       | Female | 57                      | Nil                    | N215S                           | 95                               | No                                          |
| 44        | Untreated       | Male   | 29                      | Nil                    | N215S                           | 94                               | No                                          |
| 45        | Untreated       | Female | 27                      | Nil                    | G128E                           | 99                               | No                                          |
| 46        | Untreated       | Female | 39                      | Nil                    | R227Q                           | 67                               | No                                          |
| 47        | Untreated       | Female | 22                      | Nil                    | pA156T                          | 122                              | No                                          |
| 48        | Untreated       | Female | 19                      | Nil                    | pA156T                          | 141                              | No                                          |
| 49        | Untreated       | Male   | 21                      | Nil                    | E6,c.833dupA                    | 147                              | No                                          |
| 50        | Untreated       | Female | 37                      | Nil                    | N215S                           | 118                              | No                                          |
| 51        | Treated         | Male   | 53                      | Agalsidase alpha       | C52R                            | 49                               | Yes                                         |
| 52        | Treated         | Male   | 17                      | Agalsidase alpha       | c.195-1 G>A                     | 104                              | No                                          |
| 53        | Treated         | Female | 49                      | Agalsidase alpha       | c.858_863delinsTTGGG            | 115                              | No                                          |
| 54        | Treated         | Male   | 41                      | Agalsidase alpha       | D165Y                           | 57                               | Yes                                         |
| 55        | Treated         | Male   | 35                      | Agalsidase beta        | W226R                           |                                  | Yes                                         |
| 56        | Treated         | Female | 49                      | Agalsidase beta        | c1193_1196del                   | 17                               | Yes                                         |
| 57        | Treated         | Female | 58                      | Agalsidase alpha       | N215S                           | 77                               | Yes                                         |
| 58        | Treated         | Male   | 25                      | Agalsidase alpha       | M284T                           | 77                               | No                                          |

|    |         |        |    |                  |           |     |     |
|----|---------|--------|----|------------------|-----------|-----|-----|
| 59 | Treated | Male   | 69 | Agalsidase beta  | N215S     | 97  | Yes |
| 60 | Treated | Male   | 37 | Agalsidase alpha | Double    | 127 | Yes |
| 61 | Treated | Female | 60 | Agalsidase alpha | R227Q     | 66  | Yes |
| 62 | Treated | Male   | 34 | Agalsidase beta  | R220X     | 96  | No  |
| 63 | Treated | Male   | 36 | Agalsidase beta  | R220X     | 94  | No  |
| 64 | Treated | Female | 38 | Agalsidase beta  | delGlu358 | 77  | Yes |
| 65 | Treated | Female | 58 | Agalsidase alpha | delGlu358 | 64  | Yes |
| 66 | Treated | Male   | 30 | Agalsidase alpha | R301X     | 111 | No  |
| 67 | Treated | Female | 58 | Agalsidase alpha | P205T     | 87  | No  |
| 68 | Treated | Male   | 43 | Migalastat       | L300P     | 79  | Yes |
| 69 | Treated | Male   | 37 | Agalsidase beta  | W287R     | 81  | Yes |
| 70 | Treated | Female | 13 | Agalsidase alpha | delGlu358 | 225 | No  |
| 71 | Treated | Male   | 27 | Agalsidase beta  | M284T     | 99  | No  |
| 72 | Treated | Male   | 51 | Agalsidase beta  | R301Q     | 94  | Yes |
| 73 | Treated | Female | 65 | Agalsidase beta  | Y134S     | 89  | Yes |
| 74 | Treated | Male   | 37 | Agalsidase beta  | M187T     |     | Yes |
| 75 | Treated | Male   | 31 | Agalsidase alpha | M284T     | 92  | Yes |
| 76 | Treated | Female | 61 | Agalsidase alpha | N215S     | 71  | Yes |
| 77 | Treated | Male   | 21 | Agalsidase alpha | N215S     |     | No  |
| 78 | Treated | Female | 48 | Agalsidase beta  | G128E     | 63  | Yes |
| 79 | Treated | Male   | 29 | Agalsidase alpha | G128E     | 100 | No  |
| 80 | Treated | Male   | 39 | Agalsidase beta  | G128E     | 71  | Yes |
| 81 | Treated | Female | 46 | Agalsidase alpha | M1L       | 78  | Yes |
| 82 | Treated | Male   | 47 | Agalsidase beta  | M1L       |     | Yes |
| 83 | Treated | Male   | 39 | Agalsidase beta  | M284T     | 55  | Yes |
| 84 | Treated | Female | 42 | Agalsidase alpha | M284T     | 75  | Yes |
| 85 | Treated | Male   | 30 | Agalsidase alpha | M284T     | 14  | Yes |
| 86 | Treated | Male   | 31 | Agalsidase alpha | G128E     | 110 | No  |
| 87 | Treated | Male   | 34 | Agalsidase beta  | G128E     | 92  | No  |
| 88 | Treated | Male   | 52 | Agalsidase beta  | pA156T    | 59  | Yes |

**Supplementary Table S4:** Post-hoc exploratory analysis by participant sex

|                               | Group by time interaction from linear mixed effects model* |                         |                  |
|-------------------------------|------------------------------------------------------------|-------------------------|------------------|
|                               | $\beta$ -coefficient                                       | 95% confidence interval | P-value          |
| <b>Overall (n=88)</b>         |                                                            |                         |                  |
| Lumbar spine Z-score          | -0.026                                                     | -0.078, 0.027           | 0.334            |
| Total hip Z-score             | -0.110                                                     | -0.158, -0.061          | <b>&lt;0.001</b> |
| Femoral neck Z-score          | -0.090                                                     | -0.142, -0.038          | <b>0.001</b>     |
| <b>Female patients (n=55)</b> |                                                            |                         |                  |
| Lumbar spine Z-score          | -0.067                                                     | -0.134, -0.001          | <b>0.046</b>     |
| Total hip Z-score             | -0.123                                                     | -0.201, -0.046          | <b>0.002</b>     |
| Femoral neck Z-score          | -0.115                                                     | -0.201, -0.030          | <b>0.008</b>     |
| <b>Male patients (n=33)</b>   |                                                            |                         |                  |
| Lumbar spine Z-score          | -0.015                                                     | -0.118, -0.089          | 0.784            |
| Total hip Z-score             | -0.086                                                     | -0.154, -0.017          | <b>0.014</b>     |
| Femoral neck Z-score          | -0.067                                                     | -0.135, 0.000           | 0.050            |

Table shows linear mixed effects model beta coefficient for group-by-time change in Z-score (for lumbar spine, total hip and femoral neck bone density). All models have been adjusted for baseline values of age, sex, body mass index, kidney function (estimated glomerular filtration rate), use of anti-epileptic medications and smoking history. Overall model shown for all participants, as well as exploratory analyses where models were fitted after restriction to either female or male participants.
